# Supplementary material for: Uptake of tire-derived compounds in leafy vegetables and implications for human dietary exposure
Source: Frontiers journal article supplement (doi:10.3389/fenvs.2024.1384506), 2024-05-28
Supplement: Data_Sheet_1.docx [file Data_Sheet_1.docx]

Supporting Information for

**Anya Shermana,b,c, Luzian Elijah Hämmerlea, Evyatar Ben Mordechayd, Benny Chefetzd, Thorsten Hüffera,c, Thilo Hofmanna,c***

a) University of Vienna, Centre for Microbiology and Environmental Systems Science, Department of Environmental Geosciences EDGE, 1090 Vienna, Austria.

b) University of Vienna, Doctoral School in Microbiology and Environmental Science, 1090 Vienna, Austria.

c) University of Vienna, Research Platform Plastics in the Environment and Society (PLENTY), 1090 Vienna, Austria.

d) Department of Soil and Water Sciences, Institute of Environmental Sciences, Faculty of Agriculture, Food and Environment, The Hebrew University of Jerusalem. P.O. Box 12, Rehovot 7610001, Israel.

***Correspondence:**

Thilo Hofmann

[thilo.hofmann@univie.ac.at](mailto:thilo.hofmann@univie.ac.at)

Contents

[Uptake of Tire-Derived Compounds in Leafy Vegetables and Implications for Human Dietary Exposure 1](#_Toc158371720)

[Table S1 Sample Information 2](#_Toc158371721)

[Table S2: Physiochemical properties of the tire-derived compounds 3](#_Toc158371722)

[Table S3: UPLC-MS/MS Method Details 5](#_Toc158371723)

[Section S1: Peak Picking Settings 7](#_Toc158371724)

[Section S2: Orbitrap-HRMS analysis 8](#_Toc158371725)

[Section S3 Non-target workflow specifications using Compound Discoverer software 9](#_Toc158371726)

[Table S4 Limit of quantification (LOQ) and recovery for each compound. 13](#_Toc158371727)

[Section S4 Discussion of outlier samples 14](#_Toc158371728)

[Table S5 ANOVA results for tire-derived compounds (TDC) and pharmaceuticals (PPCP) 15](#_Toc158371729)

[Section S5 Transformation Products detected 16](#_Toc158371730)

[Table S6 Pharmaceuticals in leafy vegetable samples (ng/g dry weight) 18](#_Toc158371731)

[References used in the Supporting Information 18](#_Toc158371732)

Table S1 Sample Information

| Sample ID | Sample set | Growth country | Crop type | WWTP for irrigation | Compost application |
| --- | --- | --- | --- | --- | --- |
| IL-01 | Israel | Israel | lettuce | Haifa |  |
| IL-02 | Israel | Israel | parsley | Haifa | No |
| IL-03 | Israel | Israel | Mint | Jerusalem (Sorek) | Yes |
| IL-04 | Israel | Israel | Mint | Haifa | Yes |
| IL-05 | Israel | Israel | parsley | Shafdan | yes |
| IL-06 | Israel | Israel | Coriander | Shafdan | no |
| IL-07 | Israel | Israel | Parsley | Shafdan | yes |
| IL-08 | Israel | Israel | Parsley | Haifa | yes |
| IL-09 | Israel | Israel | Celery | Shafdan | yes |
| IL-10 | Israel | Israel | Dill | Jerusalem (Sorek) | yes |
| IL-11 | Israel | Israel | Parsley | Shafdan | Yes |
| IL-12 | Israel | Israel | Beetroot leaves | Shafdan | Yes |
| IL-13 | Israel | Israel | Beetroot leaves | Haifa |  |
| CH-01 | Switzerland | Switzerland | Chicory |  |  |
| CH-02 | Switzerland | Switzerland | Lamb’s lettuce |  |  |
| CH-03 | Switzerland | Switzerland | Lamb’s lettuce |  |  |
| CH-04 | Switzerland | Switzerland | Lettuce |  |  |
| CH-05 | Switzerland | Switzerland | Lamb’s lettuce |  |  |
| IT-01 | Switzerland | Italy | Lettuce |  |  |
| IT-02 | Switzerland | Italy | Lettuce |  |  |
| IT-03 | Switzerland | Italy | Lettuce |  |  |
| IT-04 | Switzerland | Italy | Spinach |  |  |
| IT-05 | Switzerland | Italy | Arugula |  |  |
| ES-01 | Switzerland | Spain | Lettuce |  |  |
| ES-02 | Switzerland | Spain | Lettuce |  |  |
| ES-03 | Switzerland | Spain | Lettuce |  |  |
| ES-04 | Switzerland | Spain | Lettuce |  |  |
| ES-05 | Switzerland | Spain | Lettuce |  |  |

Blank cells indicate no information available to us.

For samples from Israel, detailed information about sampling locations, wastewater treatment plants, and sampling procedure are provided in Ben Mordechay et al 2021.(1)

Table S2: Physiochemical properties of the tire-derived compounds

| Compound | Structure | Log *K*OW | pKa |
| --- | --- | --- | --- |
| Benzothiazole | 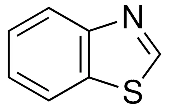 | 2.17(2) | 1.2(3) (conjugate acid) |
| 2-hydroxybenzothiazole * | 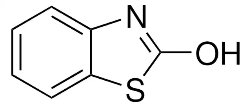 | 2.35(2) | 8.9(4) |
| 2-aminobenzothiazole | 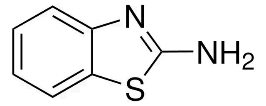 | 2.00(2) | 3.58** (conjugate acid) |
| 2-mercaptobenzothiazole | 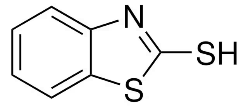 | 1.83(2) | 7.1(4) |
| 5-methyl-1H-benzotriazole | 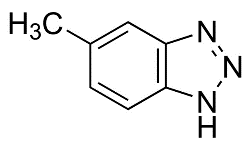 | 1.13(5) | 8.5(4) |
| Aniline | 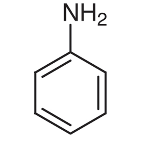 | 0.91(6) | 4.6(7) (conjugate acid) |
| 1,3-diphenylguanidine | 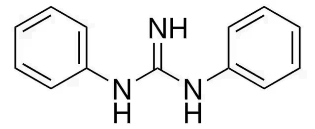 | 3.61(8) | 9.74(8) (conjugate acid) |
| HMMM | 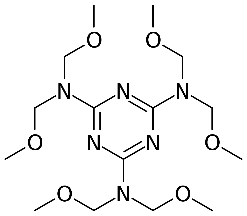 | 1.26(8) | 3.60(8) (conjugate acid) |
| 6PPD | 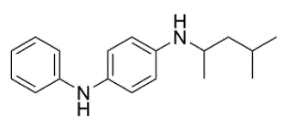 | 4.47(9) | 6.46(9) (conjugate acid) |
| IPPD | 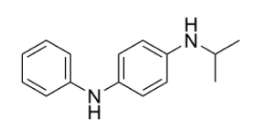 | 3.28(9) | 6.42(9) (conjugate acid) |
| CPPD | 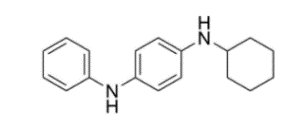 | 4.64(9) | 6.42(9) (conjugate acid) |
| DPPD | 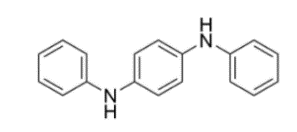 | 4.93(9) | 2.42(9) (conjugate acid) |
| 6PPD-quinone | 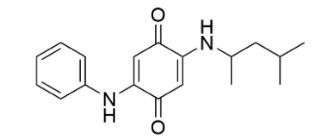 | 3.98(9) | 0.61(9) |
| IPPD-quinone | 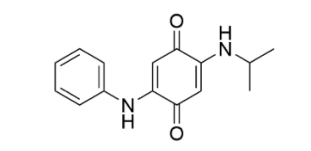 | 2.58(9) | 0.87(9) |
| CPPD-quinone | 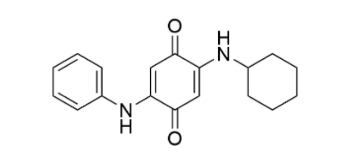 | 3.94(9) | 0.62(9) |
| DPPD-quinone | 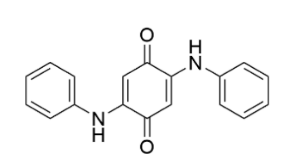 | 3.46(9) | 0.47(9) |

*2-hydroxybenzothiazole is a tautomer of 2-benzothiazolinone and the two forms exist in equilibrium.

**pKa modelled using Chemicalize software (Chemaxon)

Table S3: UPLC-MS/MS Method Details

All samples were analyzed by ultra-performance liquid chromatography - triple quadrupole mass spectrometry (Agilent 1290 Infinity II - Agilent 6470) using a C18 column (Acquity HSS T3, 1.8 µm, Waters, 50 mm) in the positive ionization mode (capillary voltage: 2500 V) via multiple reaction monitoring (MRM). The LC flow rate was 0.6 mL min-1 at a column temperature of 40 °C and the injection volume was 5 µL. The mobile phase consisted of ultrapure water (Phase A) and acetonitrile (Phase B), both containing 0.1% formic acid. The eluent gradient was held at 95% Phase A for one minute, then the contribution of Phase A decreased from 95 to 5% over 9 min, was held at 5% for 2 min and increased again to 95% over the last 1 min. Column was then re-equilibrated at 95% Phase A for one minute. Electrospray ionization (ESI) was achieved at gas temp 240°C, gas flow 5 L min-1. The nebulizer was set to 30 psi; sheath gas to 250°C, 11 L min-1. Transitions from precursor ions to product ions are specified in the following table. At least 2 product ions were monitored per compound, quantifier ions are indicated in bold.

| **Compound name** | **Surrogate standard** | **Precursor ion m/z** | **Product ion m/z** | **Fragmentor voltage (V)** | **Collision energy (V)** | **Cell accelerator voltage (V)** | **tR (min)** |
| --- | --- | --- | --- | --- | --- | --- | --- |
| **2-aminobenzothiazole** | **d4-BTZ** | **151** | **109** | **150** | **30** | **5** | **1.7** |
| 2-aminobenzothiazole |  | 151 | 65 | 150 | 38 | 5 | 1.7 |
| **2-hydroxybenzothiazole** | **d4-BTZ** | **152** | **124** | **140** | **22** | **4** | **3.6** |
| 2-hydroxybenzothiazole |  | 152 | 92 | 140 | 26 | 4 | 3.6 |
| **2-mercaptobenzothiazole** | **d4-BTZ** | **168** | **135** | **135** | **28** | **5** | **4.2** |
| 2-mercaptobenzothiazole |  | 168 | 124 | 135 | 24 | 5 | 4.2 |
| 2-mercaptobenzothiazole |  | 168 | 109 | 135 | 28 | 5 | 4.2 |
| **6PPD** | **d5-6PPD-q** | **269** | **184** | **150** | **45** | **5** | **5.0** |
| 6PPD |  | 269 | 107 | 150 | 45 | 5 | 5.0 |
| 6PPD |  | 269 | 93 | 150 | 45 | 5 | 5.0 |
| 6PPD-quinone |  | 299 | 241 | 150 | 53 | 5 | 7.1 |
| 6PPD-quinone |  | 299 | 215 | 150 | 30 | 5 | 7.1 |
| **6PPD-quinone** | **d5-6PPD-q** | **299** | **187** | **150** | **30** | **5** | **7.1** |
| **Aniline** | **d4-BTZ** | **94** | **77** | **100** | **22** | **4** | **2.8** |
| Aniline |  | 94 | 51 | 100 | 23 | 4 | 2.8 |
| Aniline |  | 94 | 50 | 100 | 41 | 4 | 2.8 |
| **Benzothiazole** | **d4-BTZ** | **136** | **109** | **150** | **31** | **5** | **3.9** |
| Benzothiazole |  | 136 | 77 | 150 | 27 | 5 | 3.9 |
| Benzothiazole |  | 136 | 65 | 150 | 38 | 5 | 3.9 |
| Benzothiazole-d4 |  | 140 | 113 | 150 | 31 | 5 | 3.8 |
| Benzothiazole-d4 |  | 140 | 81 | 150 | 19 | 5 | 3.8 |
| **Benzothiazole-d4** |  | **140** | **69** | **150** | **36** | **5** | **3.8** |
| **CPPD** | **d5-6PPD-q** | **267.2** | **184** | **100** | **30** | **5** | **4.7** |
| CPPD |  | 267.2 | 107 | 100 | 50 | 5 | 4.7 |
| CPPD |  | 267.2 | 93.1 | 100 | 46 | 5 | 4.7 |
| CPPD-quinone |  | 297.1 | 215 | 130 | 18 | 5 | 6.8 |
| **CPPD-quinone** | **d5-6PPD-q** | **297.1** | **187** | **130** | **34** | **5** | **6.8** |
| CPPD-quinone |  | 297.1 | 55.2 | 130 | 50 | 5 | 6.8 |
| **d5-6PPD-quinone** |  | **304.2** | **246.1** | **110** | **36** | **4** | **7.0** |
| d5-6PPD-quinone |  | 304.2 | 220.1 | 110 | 36 | 5 | 7.0 |
| d5-6PPD-quinone |  | 304.2 | 192.1 | 110 | 36 | 5 | 7.0 |
| DPG |  | 212 | 195 | 150 | 20 | 5 | 2.8 |
| **DPG** | **d5-6PPD-q** | **212** | **119** | **150** | **20** | **5** | **2.8** |
| DPG |  | 212 | 94 | 150 | 20 | 5 | 2.8 |
| **DPPD** | **d5-6PPD-q** | **260.1** | **183** | **130** | **38** | **5** | **7.3** |
| DPPD |  | 260.1 | 167 | 130 | 46 | 5 | 7.3 |
| DPPD |  | 260.1 | 156 | 130 | 46 | 5 | 7.3 |
| **DPPD-quinone** | **d5-6PPD-q** | **291.1** | **263** | **150** | **22** | **5** | **6.4** |
| DPPD-quinone |  | 291.1 | 235.2 | 150 | 34 | 5 | 6.4 |
| DPPD-quinone |  | 291.1 | 144 | 150 | 38 | 5 | 6.4 |
| HMMM |  | 391 | 283 | 150 | 15 | 5 | 4.7 |
| HMMM |  | 391 | 253 | 150 | 23 | 5 | 4.7 |
| HMMM |  | 391 | 207 | 150 | 19 | 5 | 4.7 |
| **HMMM** | **d5-6PPD-q** | **391** | **177** | **150** | **35** | **5** | **4.7** |
| **IPPD** | **d5-6PPD-q** | **227.2** | **184** | **100** | **18** | **5** | **3.8** |
| IPPD |  | 227.2 | 118 | 100 | 46 | 5 | 3.8 |
| IPPD |  | 227.2 | 107 | 100 | 46 | 5 | 3.8 |
| IPPD-quinone |  | 257.2 | 216 | 110 | 30 | 5 | 5.6 |
| **IPPD-quinone** | **d5-6PPD-q** | **257.2** | **187** | **110** | **30** | **5** | **5.6** |
| IPPD-quinone |  | 257.2 | 170 | 110 | 34 | 5 | 5.6 |
| **5M-1H-BTR** | **d4-BTZ** | **134.1** | **77.1** | **108** | **31** | **5** | **3.2** |
| 5M-1H-BTR |  | 134.1 | 79.1 | 108 | 23 | 5 | 3.2 |
| 5M-1H-BTR |  | 134.1 | 51.2 | 108 | 45 | 5 | 3.2 |

Section S1: Peak Picking Settings

Raw data from LC-MS/MS measurements were processed with Agilent MassHunter Quantitative Analysis software. Peaks were selected within a window of 0.15 minutes to the left and right of the retention time of the highest calibration standard. Noise regions were set at 0.5 minutes to the left and right of the peak, and noise value was calculated using the ASTM method (ASTM E685-93). A signal to noise threshold of 3 was set for peak detection. Peak integration was performed using the Agile2 algorithm.

Section S2: Orbitrap-HRMS analysis

All samples were analyzed with high-performance liquid chromatography – Orbitrap high resolution mass spectrometry (Thermo Scientific Ultimate 3000 – Thermo Scientific Q ExactiveTM, hereafter: Orbitrap-HRMS) The liquid chromatography was operated using an LPG-3400SD pump. Phase A was ultrapure water with 0.1% formic acid. Phase B was acetonitrile with 0.1% formic acid. Phase A was held at 95% for one minute, then decreased to 5% over 10 minutes. It was then held at 5% for 2 minutes, before increasing back to 95% over 30 seconds. 2.5 minute equilibration time was included between each sample. Autosampling was performed with a WPS-3000 autosampler. Injection volume was 5µL. The draw speed was 0.5 µL s-1, with a 0.003 s draw delay. Blanks were injected every ten samples. Dispense speed was 1 µL s-1. The same C18 column (Acquity HSS T3, 1.8 µm, Waters 5mm) as from the triple quadrupole-MS was used and maintained at 40 ⁰C with a TCC-3000 column oven.

The Q Exactive – Orbitrap HRMS (Thermo Scientific, Vienna, Austria) was operated in Full MS / dd-MS2 mode (exact parameters below). Internal standard d4-BTZ was used as a lock mass during its elution time (4.5 to 6.0 min). Two Method blanks (determined to contain no target analytes) and three positive controls (samples determined to contain target analytes) were measured first, and Compound Discoverer was used to annotate compounds with a maximum signal ratio between the signals and blanks less than five to background compounds. This list of background compounds was used as an exclusion list in all further measurements. The expected compounds feature of compound discoverer was additionally used to generate a list of potential transformation products – this was used as an inclusion list in further measurements.

| **Orbitrap-HRMS Parameters** | |
| --- | --- |
| **General** | |
| Runtime | 1.19 to 11 min |
| Polarity | Positive |
| Default charge state | 1 |
| **Full MS** | |
| Resolution | 70,000 |
| AGC target | 1x105 |
| Maximum IT | 50 ms |
| Scan range | 70 to 1000 m/z |
| **dd-MS2** | |
| Resolution | 17,500 |
| AGC target | 1x105 |
| Maximum IT | 50 ms |
| Loop count | 5 |
| TopN | 5 |
| Isolation window | 0.4 m/z |
| (N)CE / stepped nce | 20, 30, 40 |
| **dd Settings** | |
| Minimum AGC target | 8x103 |
| Intensity threshold | 1.6x105 |
| Dynamic exclusion | 5.0 s |
| If idle… | Pick others |

Section S3 Non-target workflow specifications using Compound Discoverer software

Suspect screening workflow:


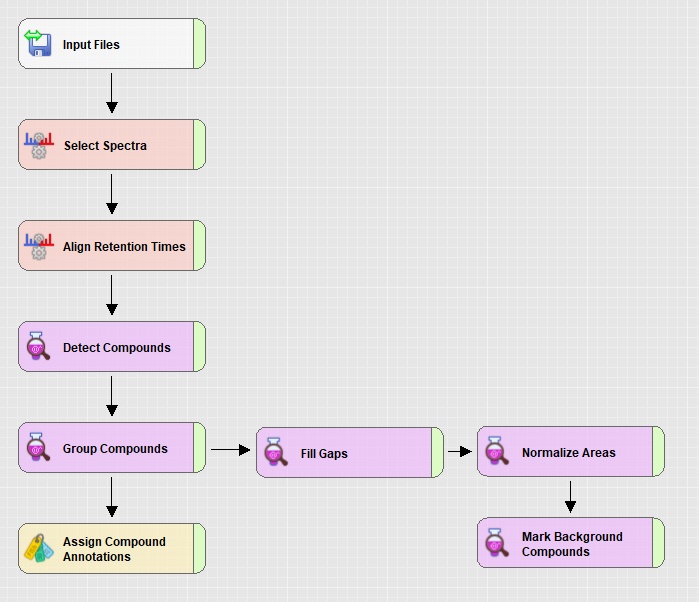


Molecular Networks workflow:


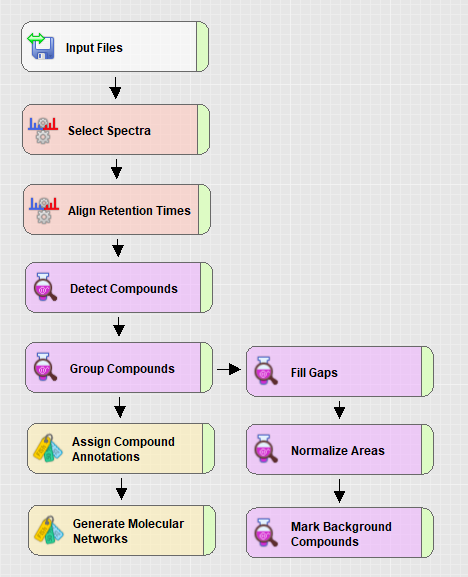


Expected Compounds workflow:


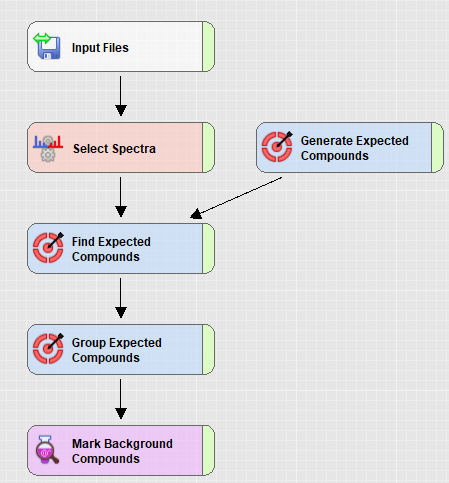


Workflow parameters by node

| **Align Retention Times** | |
| --- | --- |
| Alignment Model | Adaptive curve |
| Maximum Shift | 0.5 |
| Mass Tolerance | 5ppm |
| **Detect Compounds** | |
| Mass tolerance | 5ppm |
| Min. Peak Intensity | 100000 |
| Chromatographic S/N | 1.5 |
| Remove Baseline | False |
| Ions | [M+H]+, [M+Na]+ |
| **Group (Expected) Compounds** | |
| Mass tolerance | 5ppm |
| RT tolerance | 0.2 min |
| Align Peaks | True |
| Preferred Ions | [M+H]+ |
| Area Integration | Most Common Ion |
| Peak Rating Threshold | 5 |
| Number of Files | 2 |
| **Fill Gaps** | |
| Mass Tolerance | 5ppm |
| S/N Threshold | 1.5 |
| **Normalize Areas** | |
| Normalization Type | Constant Median |
| Exclude Blanks | True |
| **Generate Expected Compounds** | |
| Apply Dealkylation | True |
| Apply Dearylation | False |
| Max # Steps | 1 |
| Min. Mass [Da] | 100 |
| Max. # Phase II | 1 |
| Max. # All Steps | 2 |
| Ions | [M+H]+, [M+Na]+ |
| **Find Expected Compounds** | |
| Mass Tolerance | 5ppm |
| Intensity Tolerance | 30% |
| Intensity Threshold | 0.1% |
| Min. # Isotopes | 2 |
| Use Most Intense Isotope only | True |
| Min. Peak Intensity | 100000 |
| Chromatographic S/N | 3 |
| Remove Baseline | False |
| **Generate Molecular Networks** | |
| Use Full MSn Tree | True |
| Match Mass Shift | True |
| Match Transformations | True |
| Variate Transformations | False |
| S/N Threshold | 3 |
| Mass Tolerance | 5 ppm |
| Min. Fragment m/z | 90 |
| Require Transformations | False |
| Require MSn | True |
| Min. MSn Score | 20 |
| Min. MSn Coverage | 20 |
| Min. Fragments | 0 |

Table S4 Limit of quantification (LOQ) and recovery for each compound.

| Compound | LOQ ng/g | Recovery % at 1 ng/g (SD) | Recovery % at 10 ng/g (SD) | Recovery % at 100 ng/g (SD) |
| --- | --- | --- | --- | --- |
| DPG | 0.2 | 57% (12) | 86% (14) | 69% (6) |
| 2OH-BTZ | 55.6 | <LOQ | 112% (24.2) | 78% (8.7) |
| BTZ | 8.3 | <LOQ | 182% (30) | 117% (4) |
| 6PPD | 0.1 | 104% | 151% (5) | 125% (5) |
| IPPD | 0.05 | 133% (12) | 73% (14) | 124% (4) |
| CPPD | 0.3 | <LOQ | 141% (5) | 124% (7) |
| DPPD | 0.6 | 113% (5) | 122% (7) | 11% (1) |
| 2amino-BTZ | 1.1 | 105% (3) | 105% (8) | 111% (2) |
| Aniline | 27.8 | <LOQ | <LOQ | 78% (13) |
| 5M-1H-BTR | 2.8 | <LOQ | 121% (14.6) | 107% (2.5) |
| 2SH-BTZ | 75.6 | <LOQ | <LOQ | 152% (4) |
| HMMM | 1.1 | 96% (16) | 106% (3) | 99% (7) |
| IPPDq | 1.1 | 121% (11) | 109% (4) | 108% (2) |
| DPPDq | 2.8 | <LOQ | 147% (8) | 178% (2) |
| CPPDq | 1.1 | 108% (4) | 112% (5) | 105% (1) |
| 6PPDq | 2.8 | 125% (5) | 109% (6) | 105% (1) |

Note: LOQ, calculated as described in Section 2.3, can vary slightly between analytical runs based on variations in instrument sensitivity or background contamination. All samples discussed in this study were quantified during a single analytical run, and the corresponding LOQ values are presented in the above table. Recovery tests were measured in a separate analytical run, in which LOQ values were slightly lower, enabling the quantification of recovery at concentrations which are in some cases lower than the LOQ reported from the samples measurement.

It must also be noted that the results of this spiking test may not reflect the extraction efficiency of compounds which are chemically bound within plant material, or associated with tire and road wear particles which were themselves taken up into plant material. Real recovery rates might be lower, and therefore actual concentrations of tire-derived compounds in leafy vegetable samples might be higher than what is reported.

Section S4 Discussion of outlier samples

IL-01 was a lettuce sample grown in a small agricultural community in the north of Israel (precise location is protected under a non-disclosure agreement). A thermoplastic factory is the only industry located in this community. Images from the factory’s website show agricultural fields surrounding manufacturing buildings. The factory produces standard and customized thermoplastics.

CH-04 was a lettuce sample from Feldhof Gemüse (Oberriet, Switzerland), which is a vegetable distributor located near the Rhine River, on the Swiss-Austrian border(10). Directly next to the Feldhof Gemüse headquarters is a production site of SAX Polymers, a plastic manufacturer(11), as well as the warehouse of Lenor Plastics(12) (circled in yellow). It is unclear whether the lettuce samples we obtained were grown directly on site, or simply distributed through the Feldhof Gemüse warehouse. In addition to the plastics factory, a major highway (A13) is located adjacent to Feldhof Gemüse.


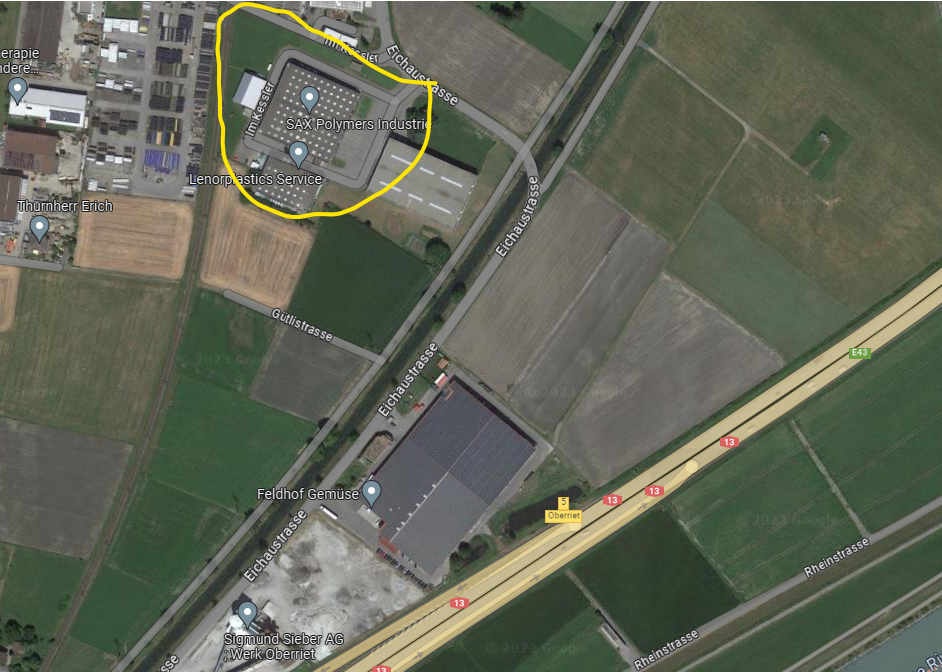


Table S5 ANOVA results for tire-derived compounds (TDC) and pharmaceuticals (PPCP)

| **Comparison** | **p-value (TDC)** | **p-value (PPCP)** |
| --- | --- | --- |
| Number of detects vs. growth country | 0.68 | NA |
| Cumulative concentration vs. growth country | 0.45 | NA |
| Number of detects vs. leafy vegetable typea | 0.09 | 0.12 |
| Cumulative concentration vs. leafy vegetable typea | 0.34 | 0.72 |
| Number of detects vs. compost applicationb | 0.70 | 0.26 |
| Cumulative concentration vs. compost applicationb | 0.17 | 0.30 |
| Number of detects vs. WWTPb | 0.40 | 0.002 |
| Cumulative concentration vs. WWTPb | 0.23 | 0.03 |
| Number of detects vs. Seasonb | 0.82 | 0.05 |
| Cumulative concentration vs. Seasonb | 0.32 | 0.16 |

aANOVA included only leafy vegetable types for which we had at least three samples (lettuce, lamb’s lettuce, and parsley)

bANOVA included only samples from Israel, for which information about compost application, wastewater treatment plant of irrigation water origin, and season was available.

Section S5 Transformation Products detected

| Compound Identifier | Molecular formula | Retention Time | Exact mass of ion | Mass error of molecular ion (Δppm) | Diagnostic Fragments | Confidence level |
| --- | --- | --- | --- | --- | --- | --- |
| HMMM TP 546 | C21H41N10O7 | 8.53 | 546.32391 | 1.21 | 107.08522; 177.12689 | 3 |
| 6PPD TP194 | C12H19NO | 8.31 | 194.15316 | -4.03 | 137.08319; 58.06564 | 3 |

Representative chromatogram 6PPD TP194


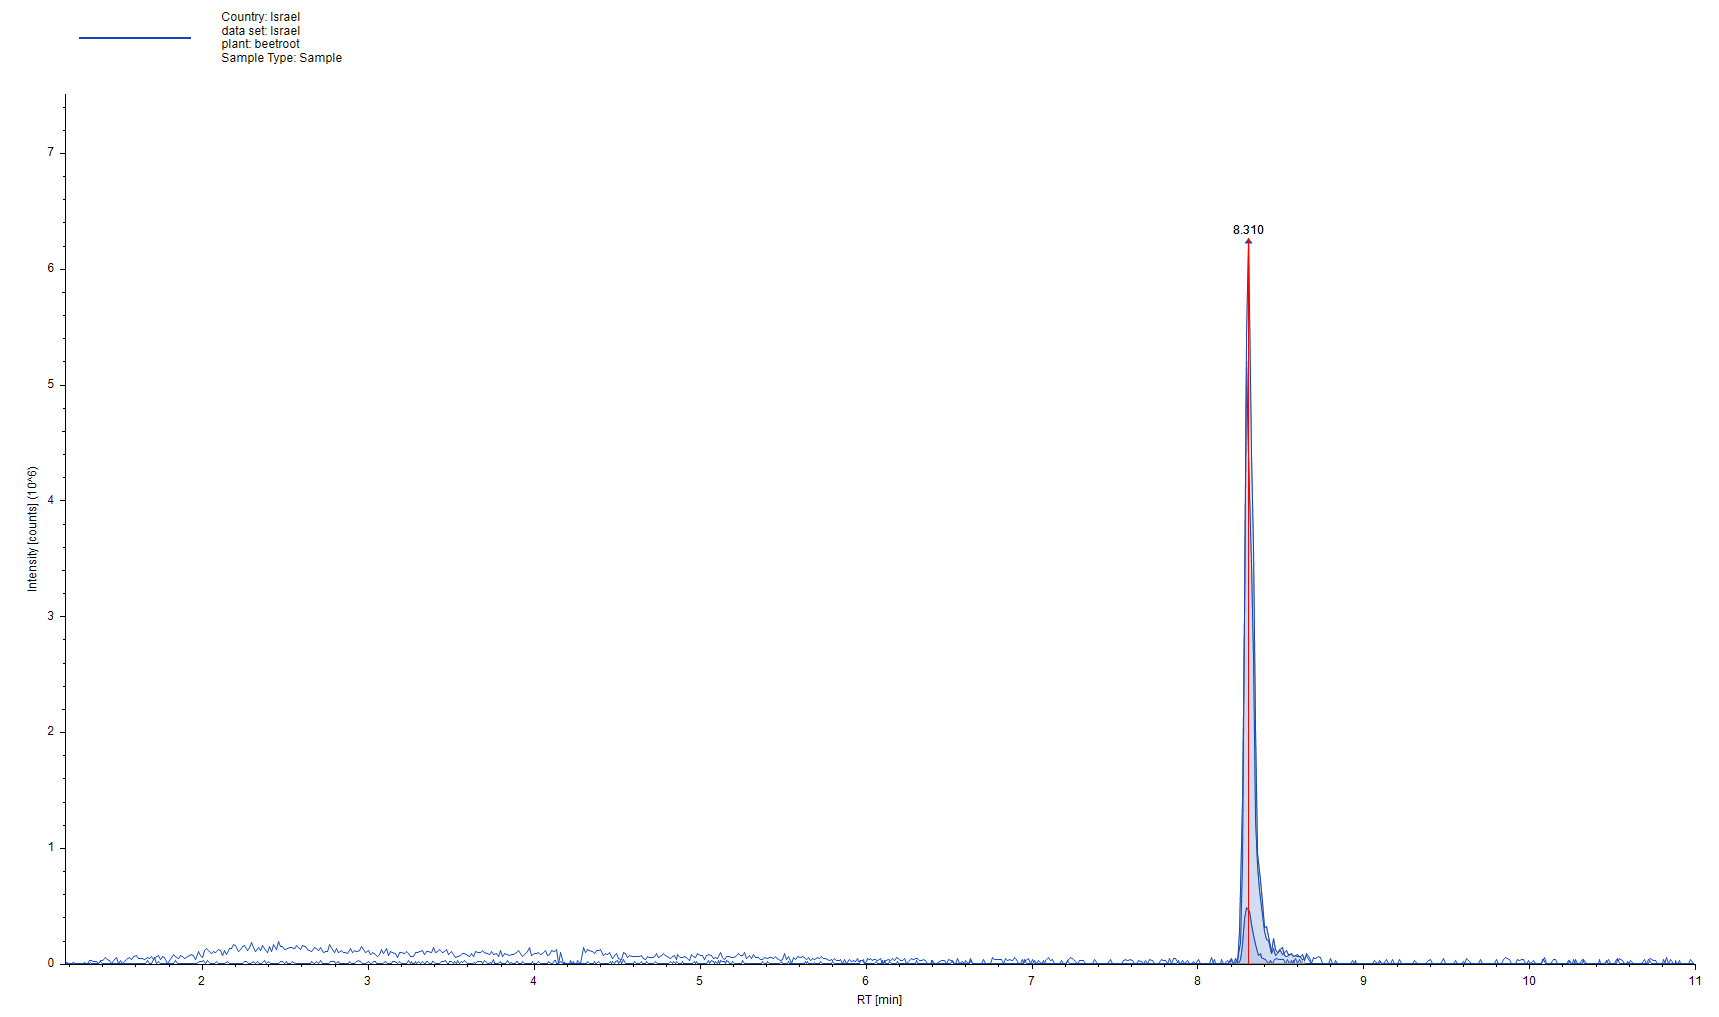


MS2 Spectrum 6PPD TP194


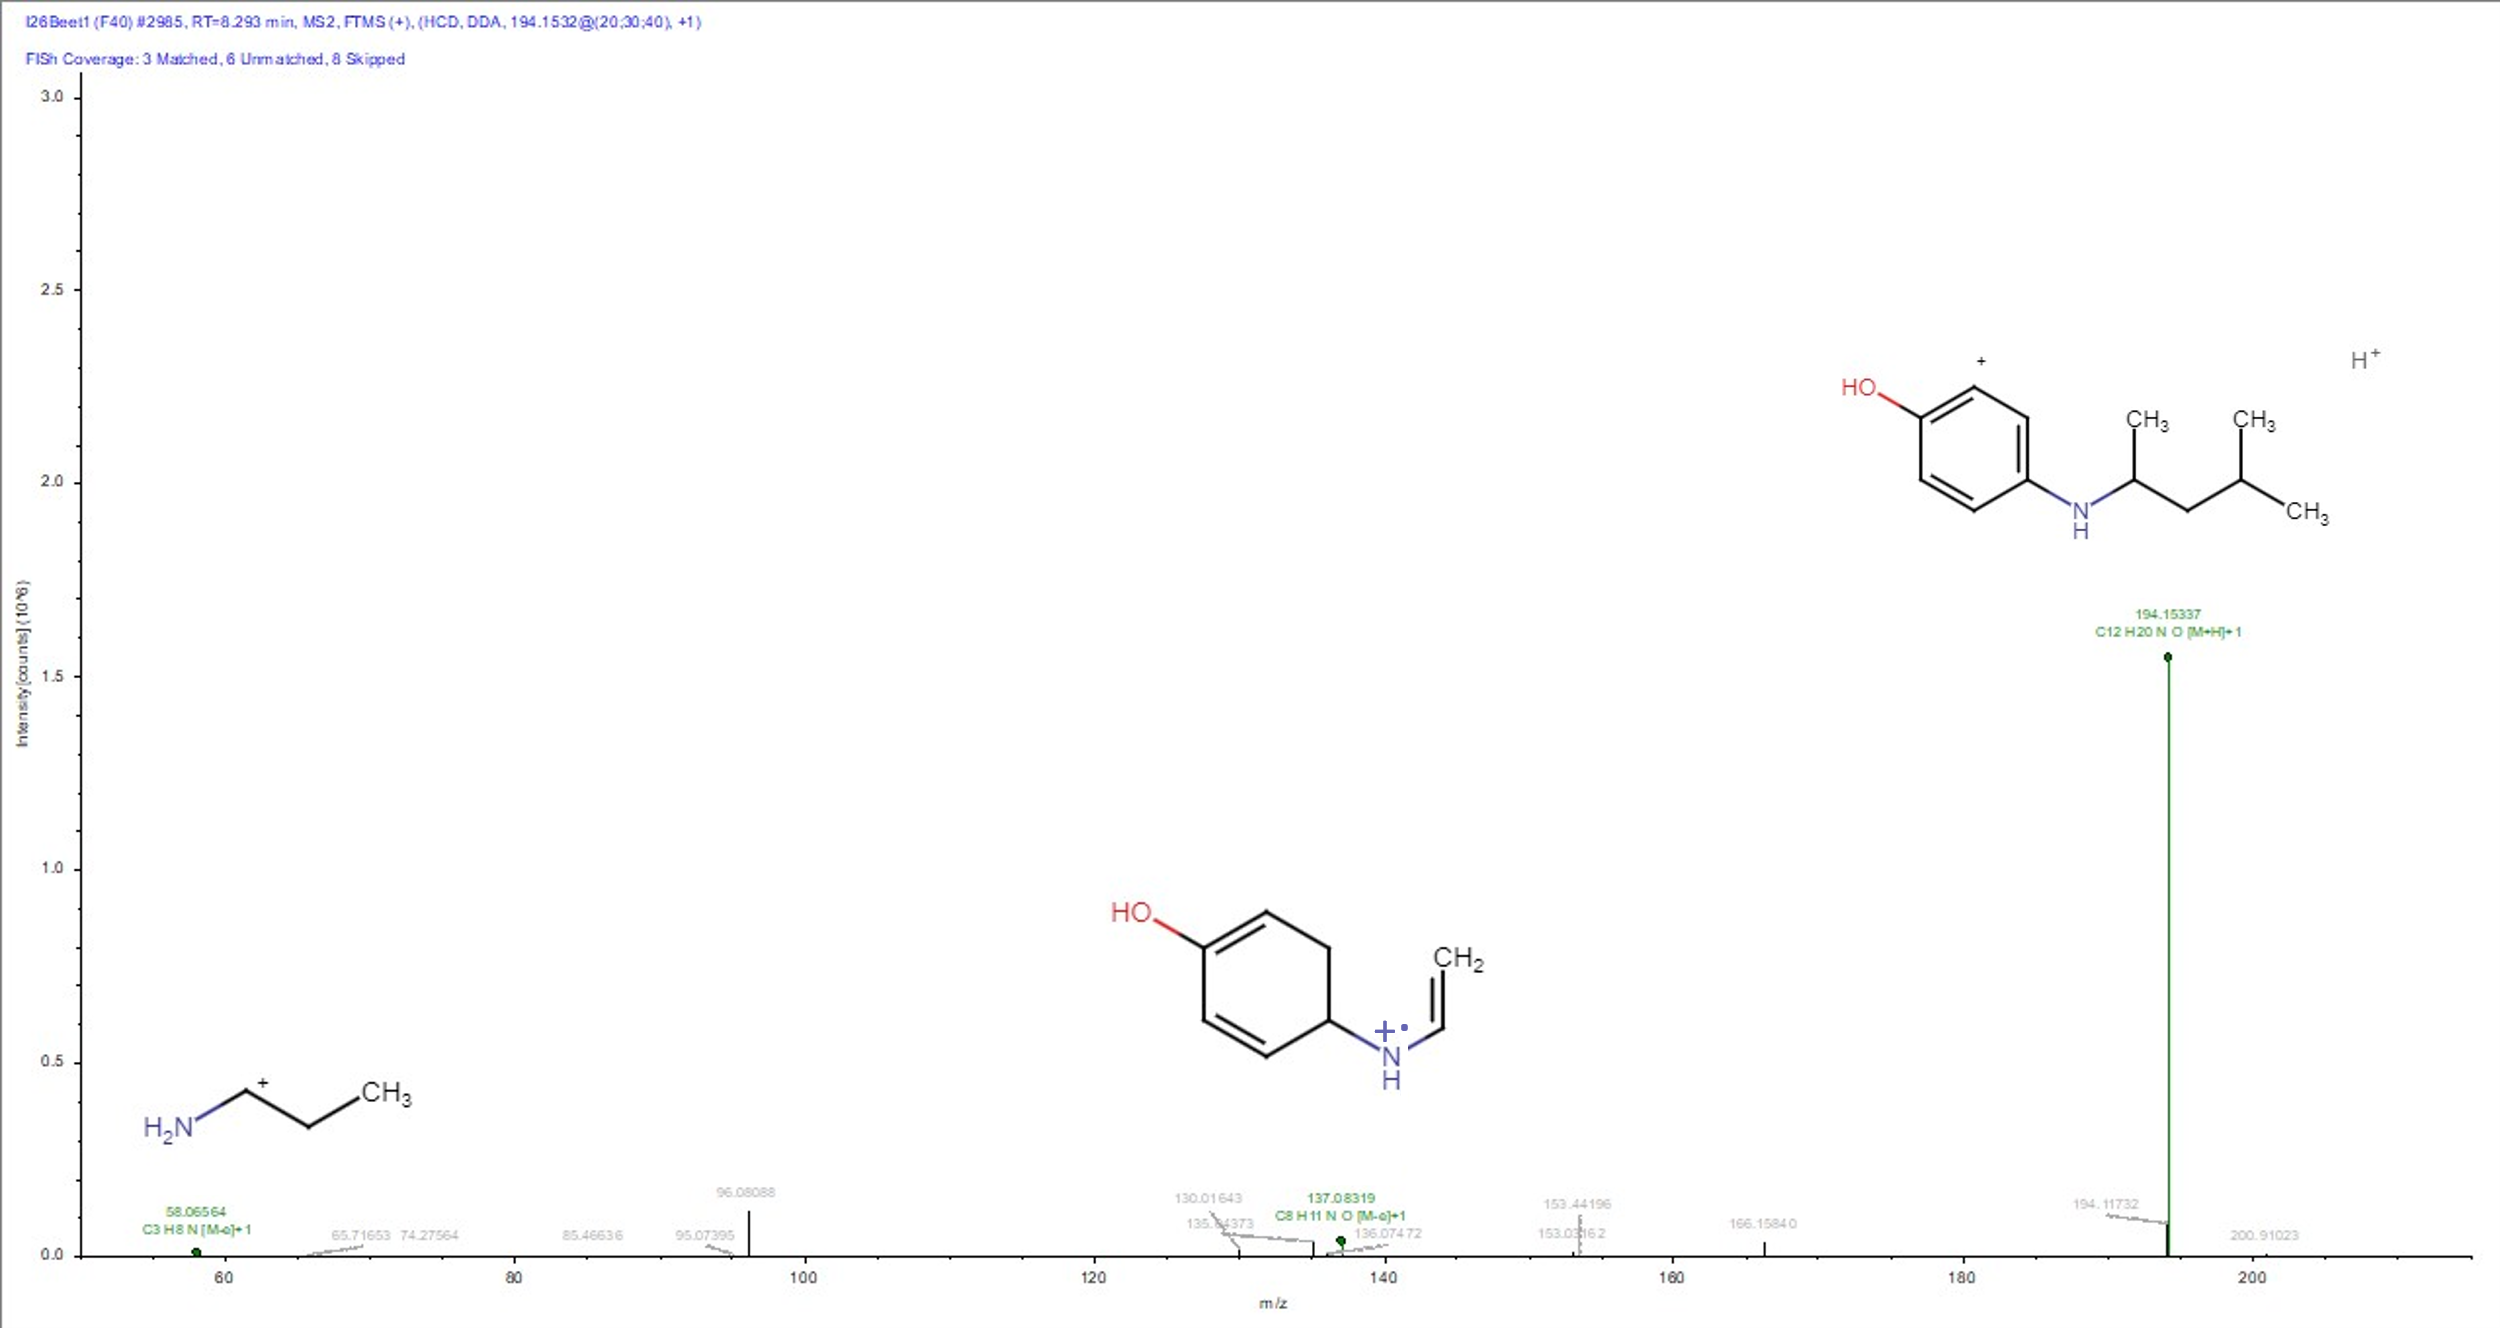


Representative chromatogram HMMM TP546

MS2 Spectrum HMMM TP546

MS2 Spectrum HMMM TP546– zoomed, to show the m/z 177.12651 and 107.08546 fragments.

Table S6 Pharmaceuticals in leafy vegetable samples (ng/g dry weight)

|  | Lamotrigine | Carbamazepine | Epoxide carbamazepine | Dihydroxy carbamazepine | Gabapentin | Atenolol | Nicotine | Venlafaxine | Crotamiton | Benzotriazole | Sotalol | Thiabendazole | Enrofloxacin | Metoprolol | Bisoprolol |
| --- | --- | --- | --- | --- | --- | --- | --- | --- | --- | --- | --- | --- | --- | --- | --- |
| IL-01 | 216.9 | 866.5 | 391 | 32.51 | 6.33 | 0 | 12.7 | 4.3 | 0 | 7.06 | 0 | 0 | 0 | 0 | 0 |
| IL-02 | 130.5 | 1343 | 612.5 | 5.52 | 0 | 0 | 0 | 1.2 | 0 | 0 | 0 | 0 | 0 | 0 | 0 |
| IL-03 | 26.8 | 118.9 | 196.7 | 9.05 | 1.14 | 15.75 | 4.4 | 9.4 | 0 | 0 | 0 | 1.5 | 0 | 0.62 | 0.44 |
| IL-04 | 67.1 | 525.8 | 674.9 | 5.4 | 0 | 0 | 13.6 | 2.1 | 0 | 0 | 0 | 0 | 0 | 0 | 0 |
| IL-05 | 53.7 | 1.9 | 2.5 | 0 | 0 | 0 | 1.4 | 0 | 0 | 2.85 | 0 | 0 | 0 | 0 | 0 |
| IL-06 | 90.6 | 2.1 | 4 | 4.33 | 0 | 0 | 12.2 | 0 | 0 | 0 | 0 | 0 | 0 | 0 | 0 |
| IL-07 | 30.4 | 23.4 | 27.7 | 0.939 | 0 | 0 | 1.4 | 0 | 1.5 | 0 | 0 | 0 | 0 | 0 | 0 |
| IL-08 | 49.6 | 190.5 | 72.7 | 0.786 | 0 | 0 | 0 | 0.4 | 0 | 0 | 0 | 0 | 1.2 | 0 | 0 |
| IL-09 | 32.2 | 11.4 | 3.8 | 0.3 | 0 | 0 | 1.4 | 0.1 | 7.40 | 0 | 0 | 0 | 1.2 | 0 | 0 |
| IL-10 | 1474 | 71.6 | 68.1 | 11.76 | 20.14 | 2.39 | 1.4 | 3.9 | 0 | 0 | 1.5 | 0 | 0 | 0.68 | 0.59 |
| IL-11 | 36.6 | 2.8 | 6.1 | 0 | 0 | 0 | 1.4 | 0 | 0 | 0 | 0 | 0 | 0 | 0 | 0 |
| IL-12 | 351.4 | 1.5 | 6.4 | 0.99 | 0.97 | 0.5 | 9.8 | 0 | 0 | 2.85 | 0 | 0 | 0 | 0 | 0 |
| IL-13 | 0 | 283.8 | 568.4 | 38.19 | 0.26 | 0 | 1.4 | 0.9 | 0 | 0 | 0 | 0 | 0 | 0 | 0 |

References used in the Supporting Information

1. Ben Mordechay E, Mordehay V, Tarchitzky J, Chefetz B. Pharmaceuticals in edible crops irrigated with reclaimed wastewater: Evidence from a large survey in Israel. *J Hazard Mater* (2021) 416:126184. doi: 10.1016/j.jhazmat.2021.126184

2. Liao C, Kim UJ, Kannan K. A Review of Environmental Occurrence, Fate, Exposure, and Toxicity of Benzothiazoles. *Environ Sci Technol* (2018) 52:5007–5026. doi: 10.1021/acs.est.7b05493

3. Eicher T, Hauptmann S. *The chemistry of heterocycles*. 2nd ed. Weinheim, Germany: WILEY-VCH GmbH & Co. (2003).

4. Bahnmüller S, Loi CH, Linge KL, Gunten U von, Canonica S. Degradation rates of benzotriazoles and benzothiazoles under UV-C irradiation and the advanced oxidation process UV/H2O2. *Water Res* (2015) 74:143–154. doi: 10.1016/j.watres.2014.12.039

5. Kodešová R, Fedorova G, Kodeš V, Kočárek M, Rieznyk O, Fér M, Švecová H, Klement A, Bořík A, Nikodem A, et al. Assessment of potential mobility of selected micropollutants in agricultural soils of the Czech Republic using their sorption predicted from soil properties. *Sci Total Environ* (2023) 865: doi: 10.1016/j.scitotenv.2022.161174

6. Carl Roth. Aniline Safety Data Sheet. (2016) bWFzdGVyfHNlY3VyaXR5RGF0YXNoZWV0c3wzNzI0NjV8YXBwbGljYXRpb24vcGRmfHNlY3VyaXR5RGF0YXNoZWV0cy9oNzIvaDE3LzkwNjg4MTgxNjk4ODYucGRmfDg2YmYxNGZlMDNjYmRiNWI4MTQ0ZTA5NjI1YTdlZmNmMWUxNDBlMTExMTBmN2VmYmIwNzkyYzI3OTA4YjM3Y2Y

7. Perrin DD. *Dissociation Constants of Organic Bases in Aqueous Solution: supplement 1972*. London: Butterworths (1972).

8. Tang T, Kolodziej EP. Sorption and Desorption of Tire Rubber and Roadway-Derived Organic Contaminants in Soils and a Representative Engineered Geomedium. *ACS ES T Water* (2022) 2:2623–2633. doi: 10.1021/acsestwater.2c00380

9. Cao G, Wang W, Zhang J, Wu P, Zhao X, Yang Z, Hu D, Cai Z. New Evidence of Rubber-Derived Quinones in Water, Air, and Soil. *Environ Sci Technol* (2022) 56:4142–4150. doi: 10.1021/acs.est.1c07376

10. Feldhof Gemüse Oberriet. (2024) https://www.feldhofgemuese.ch/ueber-uns/ [Accessed January 16, 2024]

11. SAX Polymers Unternehmen. https://www.saxpolymers.com/unternehmen/ [Accessed January 16, 2024]

12. Lenorplastics Service AG. https://www.lenorplastics.ch/unternehmen/lenorplastics-service/ [Accessed January 16, 2024]
